# Supplementary material for: Evaluation of Insecticidal Potentials of Five Plant Extracts against the Stored Grain Pest, Callosobruchus maculatus (Coleoptera: Bruchidae)
Source: MDPI journal article supplement (doi:10.3390/insects13111047), 2022-11-13
Supplement: s1 [file s1]

### ANOVA Tables

Table S1: Mean percent ( $\pm$  SE) residual mortality of *C. maculatus* after 24 h exposure period treated with six different concentrations of plant crude-extracts of five plant species under laboratory conditions during 2018-2019.

| Source                | DF  | SS      | MS     | F    | P      |
|-----------------------|-----|---------|--------|------|--------|
| Replications          | 3   | 102.50  | 34.167 |      |        |
| Plants                | 4   | 396.67  | 99.167 | 5.49 | 0.0005 |
| Concentrations        | 5   | 724.17  | 144.83 | 8.01 | 0.0000 |
| Plants*concentrations | 20  | 63.33   | 3.167  | 0.18 | 1.0000 |
| Error                 | 87  | 1572.50 | 18.075 |      |        |
| Total                 | 119 | 2859.17 |        |      |        |

Grand Mean 3.9167 CV 8.55

Table S2: Mean percent ( $\pm$  SE) residual mortality of *C. maculatus* after 48 h exposure period treated with six different concentrations of plant crude-extracts of five plant species under laboratory conditions during 2018-2019.

| Source                | DF  | SS      | MS      | F     | P      |
|-----------------------|-----|---------|---------|-------|--------|
| Replications          | 3   | 166.67  | 55.556  |       |        |
| Plants                | 4   | 1255.00 | 313.750 | 13.10 | 0.0000 |
| Concentrations        | 5   | 2160.00 | 432.000 | 18.04 | 0.0000 |
| Plants*concentrations | 20  | 215.00  | 10.750  | 0.45  | 0.9777 |
| Error                 | 87  | 2083.33 | 23.946  |       |        |
| Total                 | 119 | 5880.00 |         |       |        |

Grand Mean 9.0000 CV 13.37

Table S3: Mean percent ( $\pm$  SE) residual mortality of *C. maculatus* after 72 h exposure period treated with six different concentrations of plant crude-extracts of five plant species under laboratory conditions during 2018-2019.

| Source                | DF  | SS      | MS      | F     | P      |
|-----------------------|-----|---------|---------|-------|--------|
| Replications          | 3   | 89.17   | 29.72   |       |        |
| Plants                | 4   | 986.67  | 246.67  | 10.29 | 0.0000 |
| Concentration         | 5   | 5204.17 | 1040.83 | 43.41 | 0.0000 |
| Plants *concentration | 20  | 133.33  | 6.67    | 0.28  | 0.9990 |
| Error                 | 87  | 2085.83 | 23.98   |       |        |
| Total                 | 119 | 8499.17 |         |       |        |

Grand Mean 15.917 CV 16.76

Table S4 Mean percent ( $\pm$  SE) residual mortality of *C. maculatus* after 168 h exposure period treated with six different concentrations of plant crude-extracts of five plant species under laboratory conditions during 2018-2019.

| Source                | DF  | SS      | MS      | F     | P      |
|-----------------------|-----|---------|---------|-------|--------|
| Replications          | 3   | 110.3   | 36.76   |       |        |
| Plants                | 4   | 3414.1  | 853.53  | 18.18 | 0.0000 |
| Concentrations        | 5   | 15928.5 | 3185.71 | 67.86 | 0.0000 |
| Plants*concentrations | 20  | 196.6   | 9.83    | 0.21  | 0.9999 |
| Error                 | 87  | 4084.5  | 46.95   |       |        |
| Total                 | 119 | 23734.0 |         |       |        |

Grand Mean 31.842 CV 09.52

Table S5: Mean percent ( $\pm$  SE) residual mortality of *C. maculatus* after 336 h exposure period treated with six different concentrations of plant crude-extracts of five botanicals under laboratory conditions during 2018-2019.

| Source                | DF  | SS      | MS      | F      | P      |
|-----------------------|-----|---------|---------|--------|--------|
| Replications          | 3   | 345.7   | 115.23  |        |        |
| Plants                | 4   | 11338.6 | 2834.65 | 62.97  | 0.0000 |
| Concentrations        | 5   | 28952.9 | 5790.57 | 128.63 | 0.0000 |
| Plants*concentrations | 20  | 218.4   | 10.92   | 0.24   | 0.9996 |
| Error                 | 87  | 3916.6  | 45.02   |        |        |
| Total                 | 119 | 44772.1 |         |        |        |

Grand Mean 60.625 CV 5.07

Table S6: Mean percent ( $\pm$  SE) topical mortality of *C. maculatus* after 24 h exposure period treated with six different concentrations of plant crude-extracts of five plant species under laboratory conditions during 2018-2019.

| Source                 | DF  | SS      | MS      | F     | P      |
|------------------------|-----|---------|---------|-------|--------|
| Replications           | 3   | 460.00  | 153.333 |       |        |
| Concentrations         | 5   | 1210.00 | 242.000 | 6.81  | 0.0000 |
| Plants                 | 4   | 1488.33 | 372.083 | 10.48 | 0.0000 |
| Plants *concentrations | 20  | 231.67  | 11.583  | 0.33  | 0.9969 |
| Error                  | 87  | 3090.00 | 35.517  |       |        |
| Total                  | 119 | 6480.00 |         |       |        |

Grand Mean 9.0000 CV 6.22

Table S7: Mean percent ( $\pm$  SE) topical mortality of *C. maculatus* after 48 h exposure period treated with six different concentrations of plant crude-extracts of five plant species under laboratory conditions during 2018-2019.

| Source                | DF  | SS      | MS      | F    | P      |
|-----------------------|-----|---------|---------|------|--------|
| Replications          | 3   | 49.17   | 16.389  |      |        |
| Concentrations        | 5   | 1164.17 | 232.833 | 5.29 | 0.0003 |
| Plants                | 4   | 1136.67 | 284.167 | 6.46 | 0.0001 |
| Plants*concentrations | 20  | 123.33  | 6.167   | 0.14 | 1.0000 |
| Error                 | 87  | 3825.83 | 43.975  |      |        |
| Total                 | 119 | 6299.17 |         |      |        |

Grand Mean 14.083 CV 4.09

Table S8: Mean percent ( $\pm$  SE) topical mortality of *C. maculatus* after 72 h exposure period treated with six different concentrations of plant crude-extracts of five plant species under laboratory conditions during 2018-2019.

| Source               | DF  | SS      | MS      | F     | P      |
|----------------------|-----|---------|---------|-------|--------|
| Replications         | 3   | 271.7   | 90.56   |       |        |
| Concentrations       | 5   | 8503.4  | 1700.67 | 23.39 | 0.0000 |
| Plants               | 4   | 2067.7  | 516.93  | 7.11  | 0.0001 |
| Plants*concentration | 20  | 473.9   | 23.69   | 0.33  | 0.9969 |
| Error                | 87  | 6326.8  | 72.72   |       |        |
| Total                | 119 | 17643.5 |         |       |        |

Grand Mean 24.567 CV 3.71

Table S9: Mean percent ( $\pm$  SE) topical mortality of *C. maculatus* after 168 h exposure period treated with six different concentrations of plant crude-extracts of five plant species under laboratory conditions during 2018-2019.

| Source                     | DF  | SS      | MS      | F     | P      |
|----------------------------|-----|---------|---------|-------|--------|
| Replications               | 3   | 184.3   | 61.42   |       |        |
| Concentration              | 5   | 27187.7 | 5437.53 | 49.91 | 0.0000 |
| Plants                     | 4   | 8847.8  | 2211.95 | 20.30 | 0.0000 |
| Plants*concentration       | 20  | 1013.5  | 50.68   | 0.47  | 0.9729 |
| Error                      | 87  | 9478.2  | 108.95  |       |        |
| Total                      | 119 | 46711.5 |         |       |        |
| Grand Mean 47.267 CV 14.00 |     |         |         |       |        |

Table S10: Mean percent ( $\pm$  SE) topical mortality of *C. maculatus* after 336 h exposure period treated with six different concentrations of plant crude-extracts of five plant species under laboratory conditions during 2018-2019.

| Source                     | DF  | SS      | MS      | F     | P      |
|----------------------------|-----|---------|---------|-------|--------|
| Replications               | 3   | 578.2   | 192.72  |       |        |
| Concentrations             | 5   | 8966.3  | 1793.26 | 18.54 | 0.0000 |
| Plants                     | 4   | 13075.8 | 3268.95 | 33.80 | 0.0000 |
| Plants*concentrations      | 20  | 965.5   | 48.28   | 0.50  | 0.9603 |
| Error                      | 87  | 8414.6  | 96.72   |       |        |
| Total                      | 119 | 32000.3 |         |       |        |
| Grand Mean 79.925 CV 10.50 |     |         |         |       |        |
